# Supplementary material for: Cellular-Level Analysis of Retinal Blood Vessel Walls Based on Phase Gradient Images
Source: Diagnostics (Basel). 2023 Nov 8;13(22):3399. doi: 10.3390/diagnostics13223399 (PMC10670340; doi:10.3390/diagnostics13223399)
Supplement: Supplementary file 1 [file diagnostics-13-03399-s001.zip]

Archive with 4 entries (4 files):
- Figure S1.pdf
- Video S1.avi
- Video S2.avi
- Video S3.avi
