# Supplementary figures and images for: Cellular-Level Analysis of Retinal Blood Vessel Walls Based on Phase Gradient Images
Source: MDPI journal article supplement (doi:10.3390/diagnostics13223399), 2023-11-08

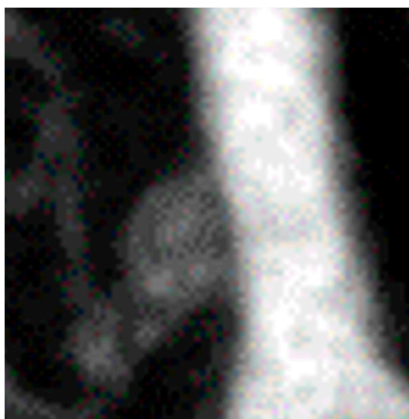

Figure S1: STD image of the video of the MA shown in Figure 8D.

Supplement: s1 [file s1]
